# Supplementary material for: Comparative study of aryl halides in Pd-mediated reactions: key factors beyond the oxidative addition step
Source: Royal Society of Chemistry journal article supplement (doi:10.1039/d0qi01133a), 2020-11-26
Supplement: d0qi01133a1.pdf [file d0qi01133a1.pdf]

## Supporting Information

### **Comparative study of aryl halides in Pd-mediated reactions: key factors beyond the oxidative addition step**

Alexey S. Galushko, Darya O. Prima, Julia V. Burykina, Valentine P. Ananikov\*

*Zelinsky Institute of Organic Chemistry, Russian Academy of Sciences, Leninsky prospekt 47,  
Moscow, 119991, Russia*

E-mail: val@ioc.ac.ru; <http://AnanikovLab.ru>

## Contents

|                                                                                  |    |
|----------------------------------------------------------------------------------|----|
| Size distribution of palladium nanoparticles before and after Heck reaction..... | 3  |
| Palladium nanoparticles found in the Heck reaction mixture .....                 | 4  |
| Overview of the «nanofishing» approach.....                                      | 8  |
| ESI-MS spectrum .....                                                            | 11 |
| Nanofishing procedure for Heck reaction at 140 °C .....                          | 12 |

## Size distribution of palladium nanoparticles before and after Heck reaction

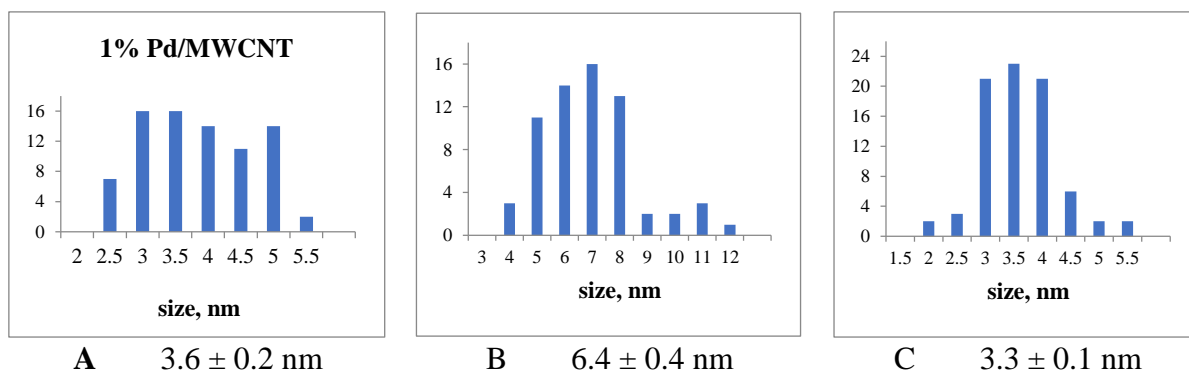

**Figure S1.** Size distribution of palladium nanoparticles in the initial catalyst (**A**); after Heck reaction with  $p\text{-NO}_2\text{-C}_6\text{H}_4\text{Br}$  remaining on the Pd/MWCNT (**B**); after Heck reaction with  $p\text{-NO}_2\text{-C}_6\text{H}_4\text{Cl}$  remaining on the Pd/MWCNT (**C**).

## Palladium nanoparticles found in the Heck reaction mixture

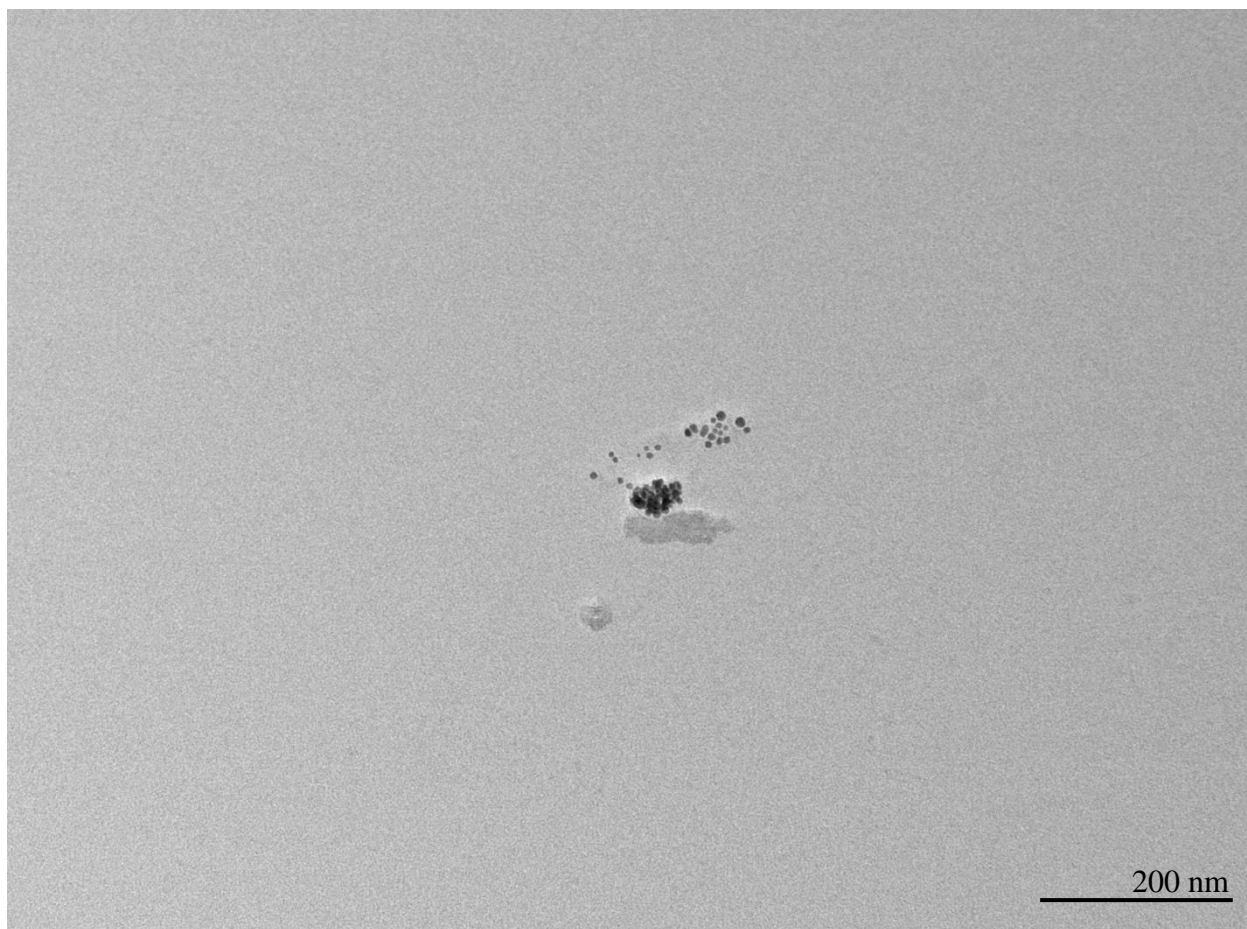

**Figure S2.** TEM image of palladium nanoparticles captured with “nanofishing” procedure after 1 h of Heck reaction involving PhBr and Pd/MWCNT.

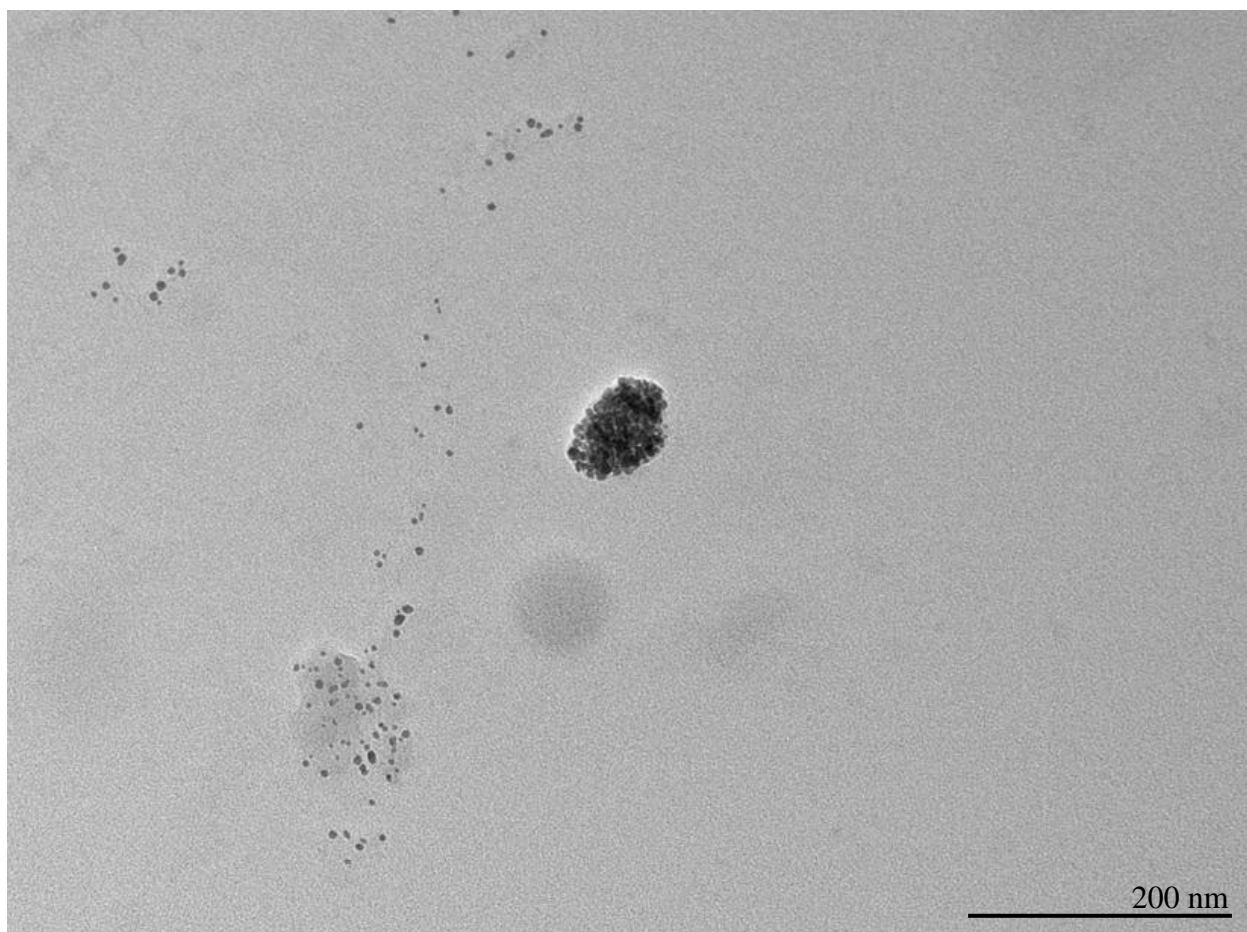

**Figure S3.** TEM image of palladium nanoparticles captured with “nanofishing” procedure after 1 h of Heck reaction involving PhBr and Pd/MWCNT.

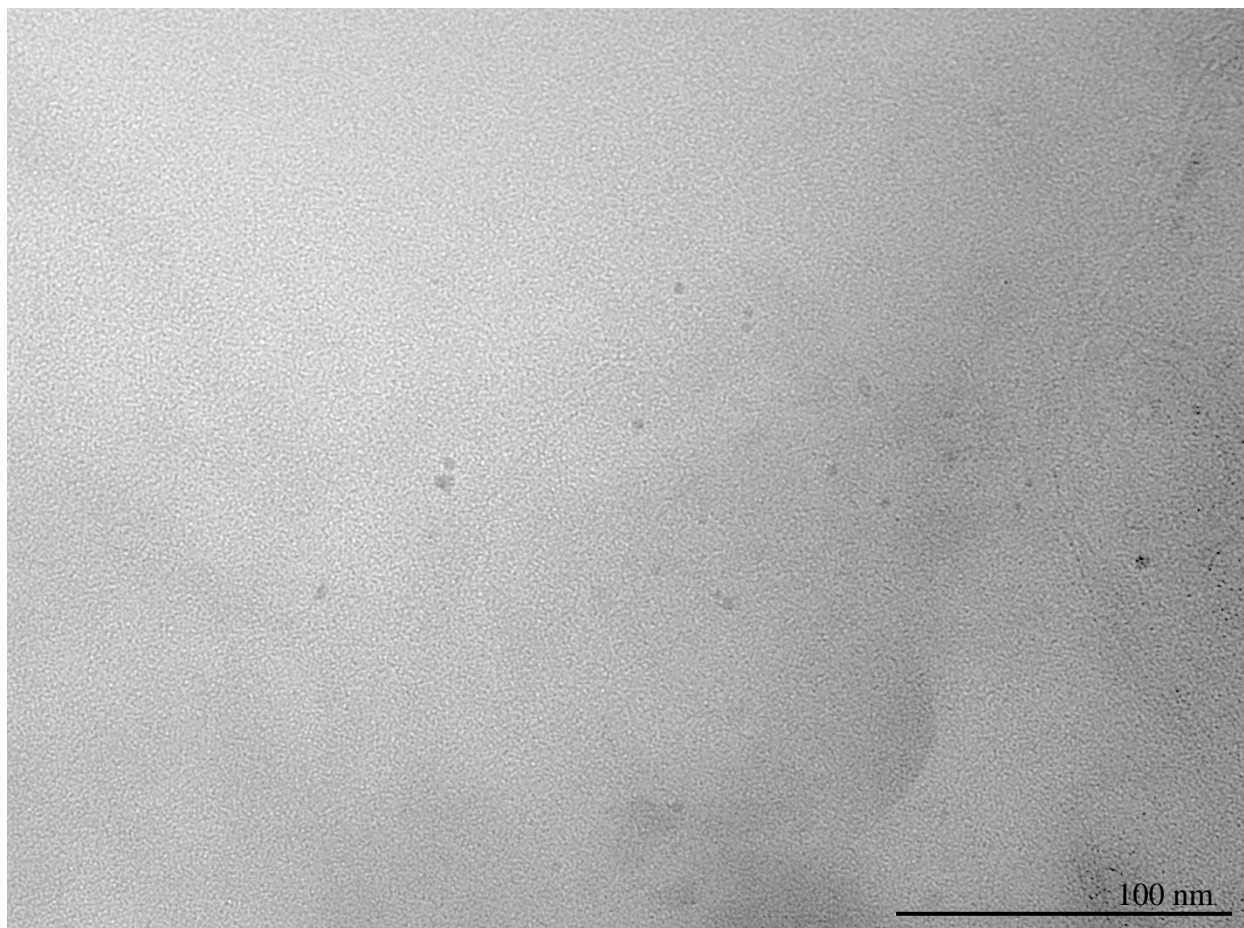

**Figure S4.** TEM image of palladium nanoparticles captured with “nanofishing” procedure after 1 h of Heck reaction involving PhBr and Pd/MWCNT.

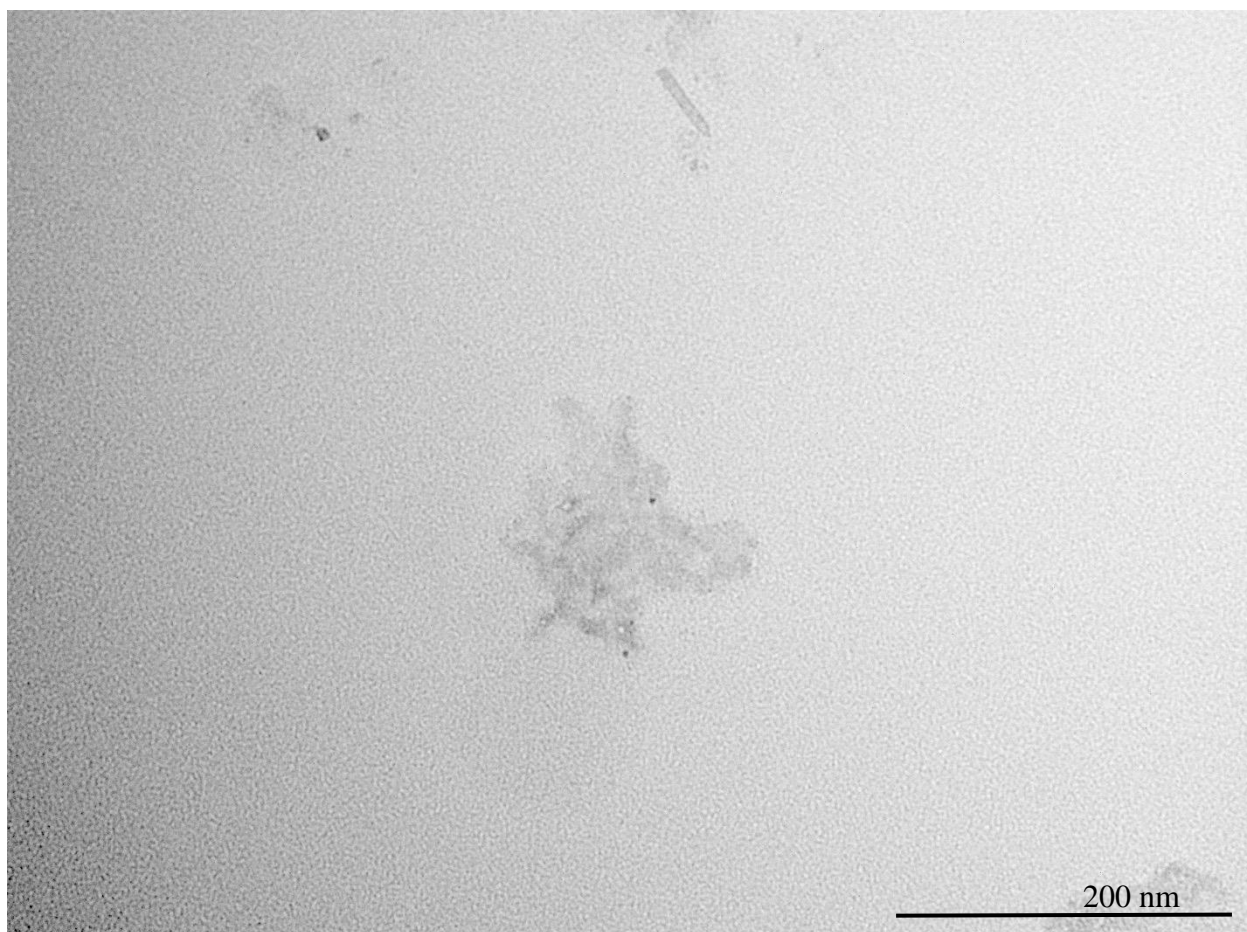

**Figure S5.** TEM image of palladium nanoparticles captured with “nanofishing” procedure after 1 h of Heck reaction involving PhBr and Pd/MWCNT.

## Overview of the «nanofishing» approach

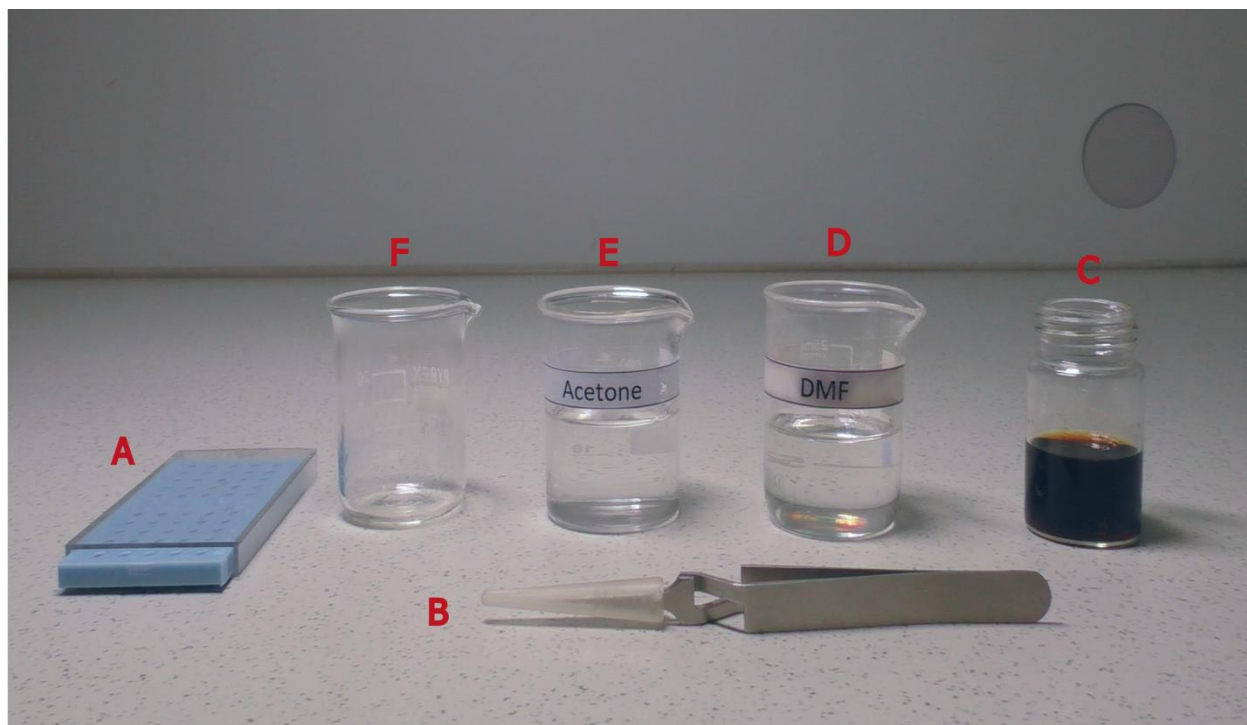

**Figure S6.** (A) Cassette for the storage of copper grids for TEM; (B) Reverse tweezers; (C) Studied solution containing nanoparticles; (D) reaction solvent for washing the grid; (E) volatile solvent (acetone) for washing grid after the reaction solvent; (F) Holder for drying in air.

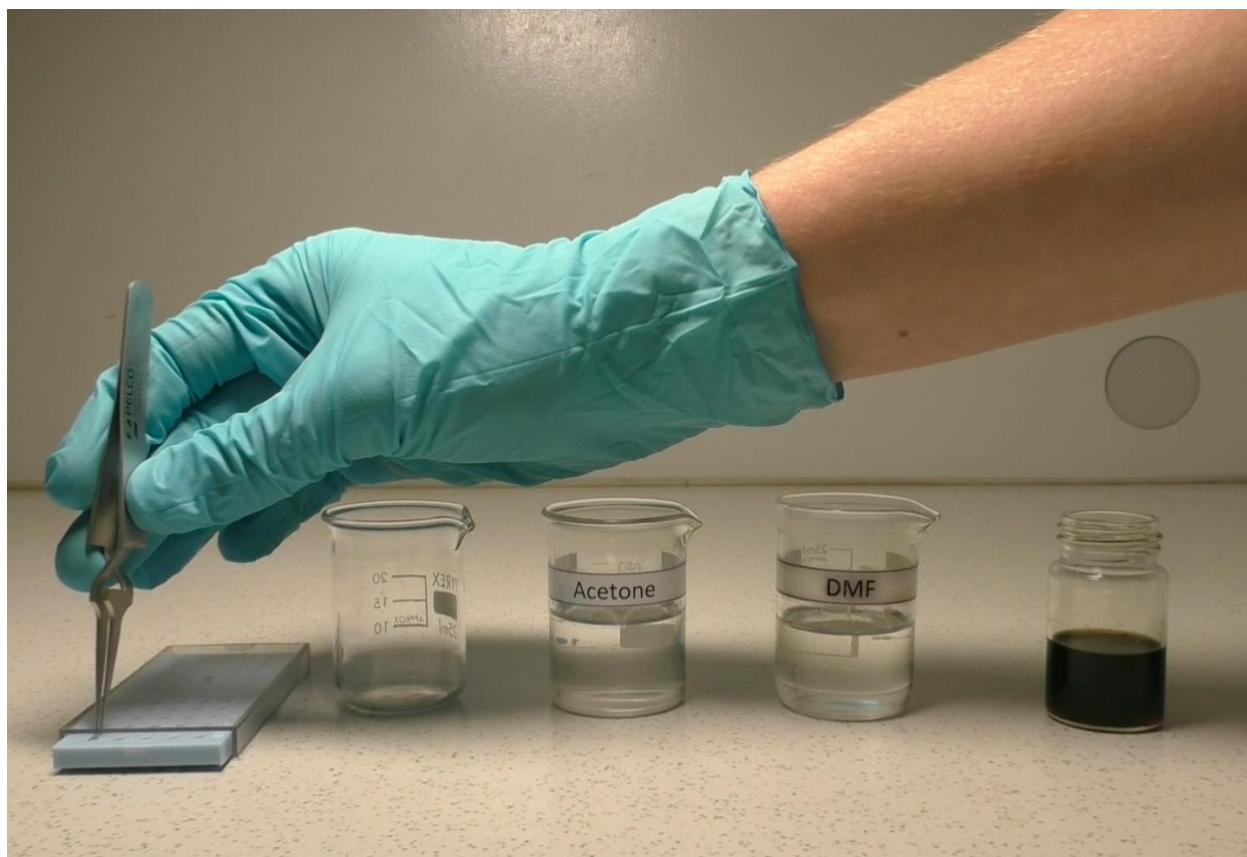

**Figure S7.** Pick the grid with reverse tweezers.

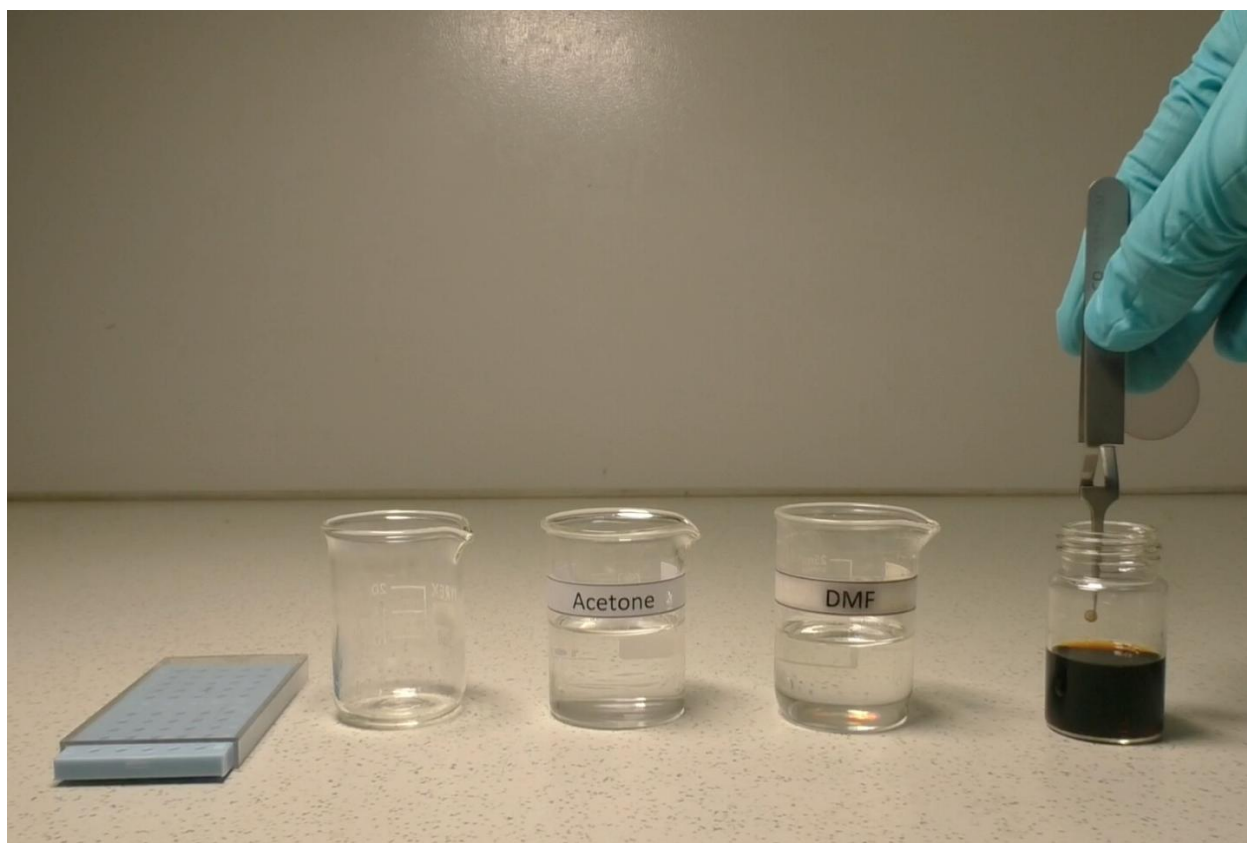

**Figure S8.** Place the grid into the reaction mixture for a few seconds.

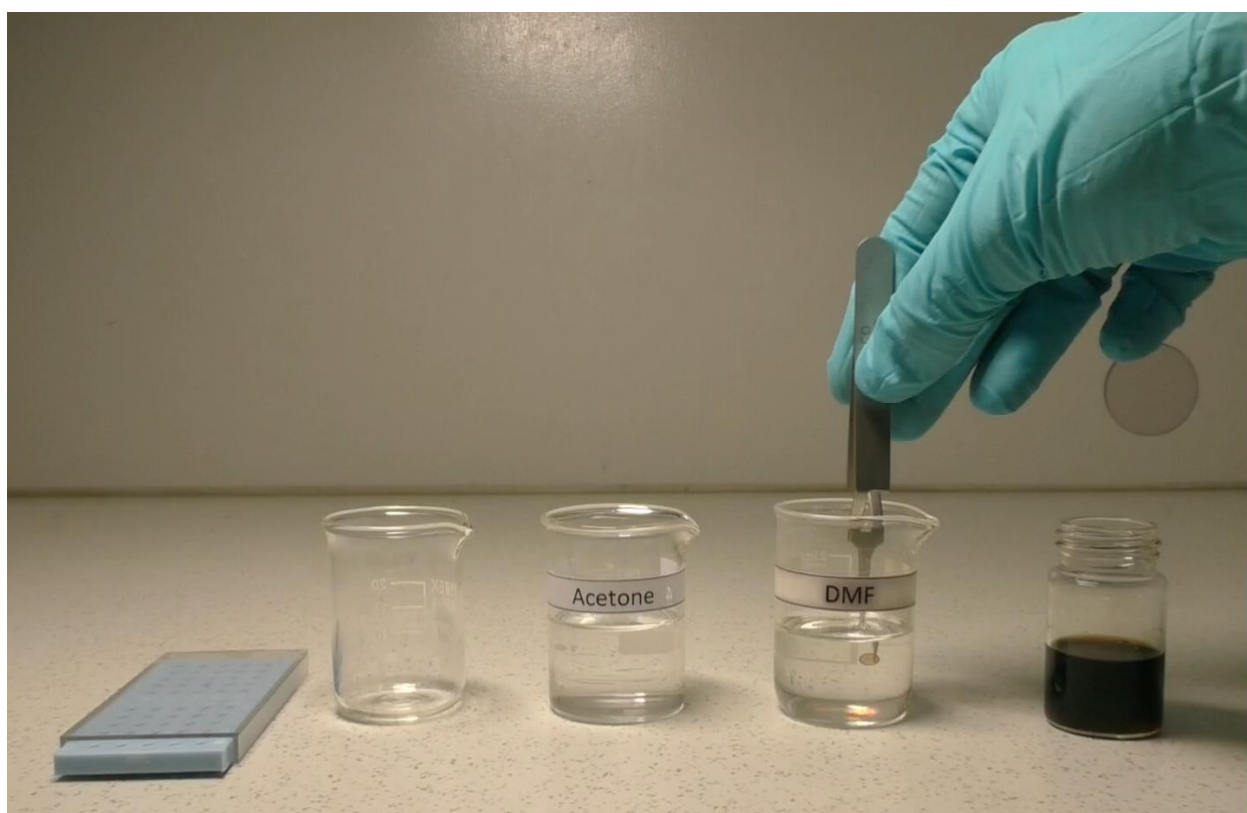

**Figure S9.** Wash the grid with the reaction solvent (DMF in this case).

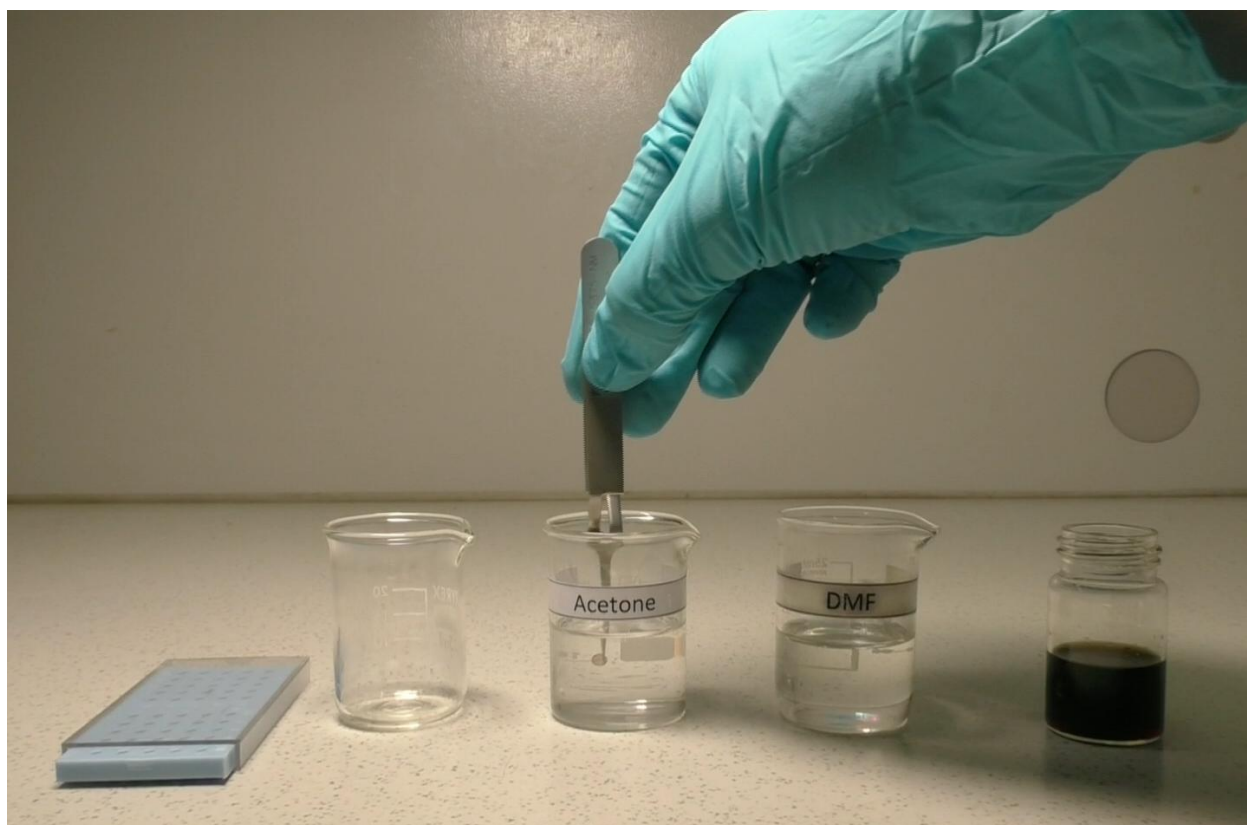

**Figure S10.** Wash the grid with a volatile solvent (acetone).

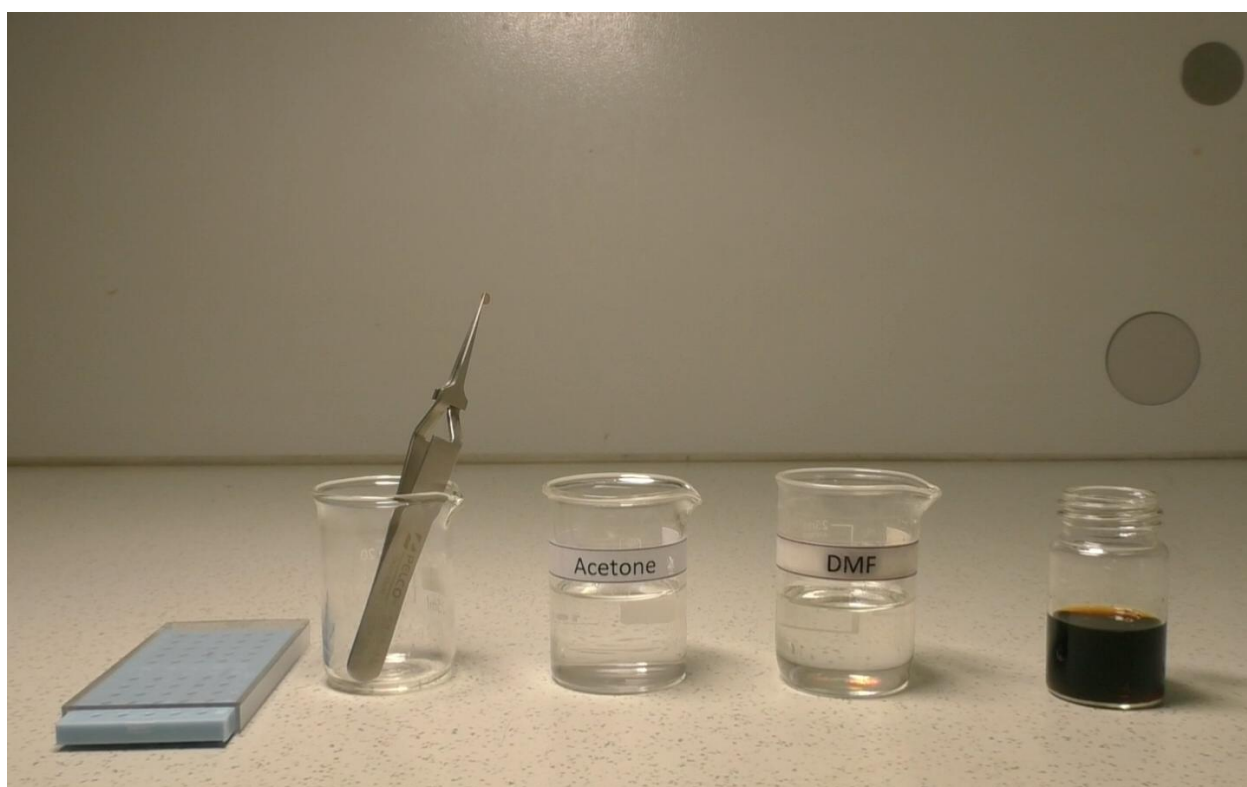

**Figure S11.** Dry the grid in air at room temperature and analyze by TEM.

## ESI-MS spectrum

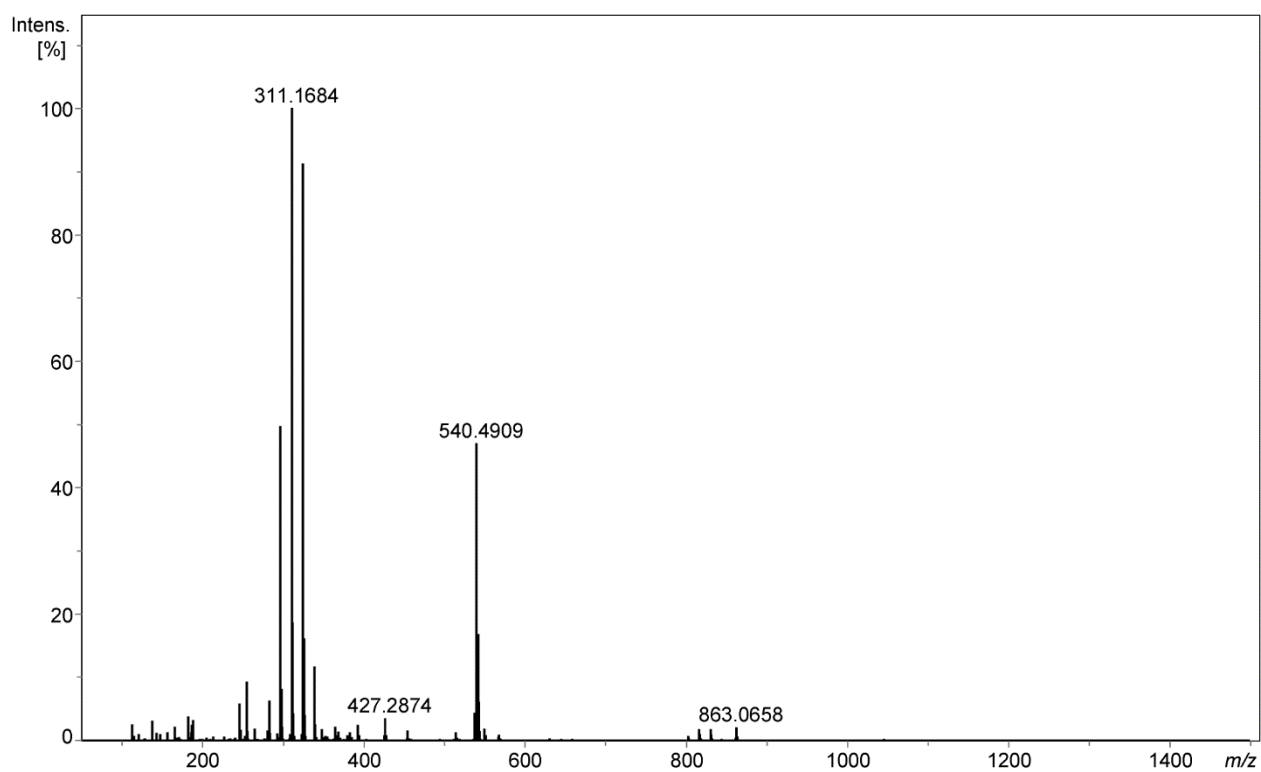

**Figure S12.** Experimental ESI(-)MS spectrum of the reaction mixture  $p\text{-NO}_2\text{-C}_6\text{H}_4\text{-Cl}$  and styrene with Pd/MWCNT in DMF solution. No corresponding palladium complexes were observed in the ArCl/[Pd]/styrene system.

**Nanofishing procedure for Heck reaction at 140 °C**

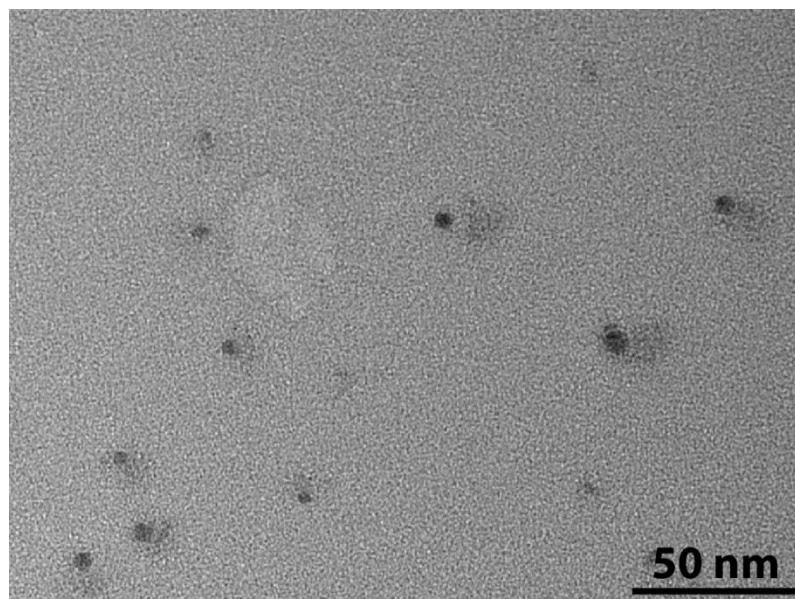

**Figure S13.** TEM study of palladium nanoparticles obtained at 1 h from the reaction mixture of the Heck reaction with ArBr at 140 °C.
